# Supplementary material for: Chronology of Onset of Mental Disorders and Physical Diseases in Mental-Physical Comorbidity - A National Representative Survey of Adolescents
Source: PLoS One. 2016 Oct 21;11(10):e0165196. doi: 10.1371/journal.pone.0165196 (PMC5074457; doi:10.1371/journal.pone.0165196)
Supplement: S1 Table — (XLS) [file pone.0165196.s001.xls]

## Sheet: Table S1
S1 Table. Discrete-time proportional hazard models for lifetime mental disorders (time-varying) predicting physical diseases (crude models).
	Arthritis				Seasonal allergy				Skin disease				Heart disease				Asthma				Diabetes/high blood sugar				Disease of digestive system				Epilepsy/seizures				Any physical disease
	HR	(95% CI)		p-value	HR	(95% CI)		p-value	HR	(95% CI)		p-value	HR	(95% CI)		p-value	HR	(95% CI)		p-value	HR	(95% CI)		p-value	HR	(95% CI)		p-value	HR	(95% CI)		p-value	HR	(95% CI)		p-value
Any affective disorder	3.07	1.62	5.83	0.001	1.05	0.82	1.34	0.704	0.76	0.58	0.98	0.036	1.35	0.54	3.34	0.514	0.94	0.62	1.41	0.75	1.29	0.67	2.47	0.431	3.87	2.52	5.96	<0.001	1.89	0.61	5.79	0.26	0.94	0.78	1.13	0.491
Any anxiety disorder	2.15	1.28	3.64	0.005	1.03	0.82	1.29	0.816	1.52	1.2	1.93	0.001	1.81	0.93	3.49	0.078	0.93	0.73	1.18	0.526	1.33	0.55	3.21	0.52	2.36	1.39	4.01	0.002	3.01	1.2	7.55	0.02	1.28	1.1	1.49	0.002
Any behavior disorder	1.16	0.66	2.03	0.595	0.99	0.83	1.19	0.922	0.91	0.77	1.09	0.301	2.14	0.91	4.99	0.078	0.86	0.62	1.21	0.387	0.86	0.47	1.57	0.619	2.04	1.23	3.38	0.007	1.53	0.63	3.7	0.334	1.05	0.9	1.24	0.533
Any substance use disorder	2.1	0.6	7.3	0.236	0.31	0.17	0.59	0.001	0.7	0.41	1.19	0.179	0.36	0.06	2.14	0.256	0.4	0.15	1.08	0.07	0.59	0.1	3.51	0.554	2.41	0.78	7.48	0.123	2.2	0.5	9.59	0.287	0.71	0.4	1.25	0.227
Any eating disorder	0.75	0.18	3.09	0.683	0.94	0.33	2.69	0.901	0.38	0.19	0.74	0.006	0.68	0.1	4.67	0.691	0.78	0.33	1.83	0.561	0.61	0.08	4.81	0.629	1.56	0.41	5.94	0.507	1.12	0.14	9.19	0.913	0.7	0.4	1.22	0.204
Any mental disorder	1.98	1.01	3.89	0.048	0.98	0.81	1.18	0.799	1.2	0.98	1.47	0.08	2.2	1.1	4.4	0.027	0.89	0.74	1.07	0.206	0.67	0.29	1.54	0.334	2.15	1.33	3.48	0.002	3.65	1.31	10.17	0.014	1.15	1	1.33	0.049
Abbreviations: CI, confidence interval; HR, hazard ratio
Note: All analyses are based on samples for which both self and parent report were available (total sample: N=6483). Due to missing information on physical diseases, completer samples were as follows: arthritis: n=6473, seasonal allergy: n=6475, skin disease: n=6479, heart disease: n= 6481, asthma: n=6477, diabetes/high blood sugar: n=6481, disease of the digestive system: n=6481, epilepsy or sei…
