# Supplementary material for: Chronology of Onset of Mental Disorders and Physical Diseases in Mental-Physical Comorbidity - A National Representative Survey of Adolescents
Source: PLoS One. 2016 Oct 21;11(10):e0165196. doi: 10.1371/journal.pone.0165196 (PMC5074457; doi:10.1371/journal.pone.0165196)
Supplement: S3 Table — (XLS) [file pone.0165196.s003.xls]

## Sheet: Table S4
S3 Table. Age of onset intervals of temporal associations between mental disorders preceding physical diseases and vice versa in participants reporting both conditions.
	Age of onset interval (in years)
	Weighted mean	95% CI
Mental disorder preceding physical disease
Any affective disorder preceding arthritis	4.94	2.69	7.19
Any affective disorder preceding disease of digestive system	4.63	3.07	6.2
Any anxiety disorder preceding skin disease	6.35	6.1	6.6
Any substance use disorder preceding seasonal allergy	3.7	0.5	6.9
Physical disease preceding mental disorder
Heart disease preceding any anxiety disorder	5.58	4.42	6.75
Heart disease preceding any mental disorder	6.23	5.32	7.13
Epilepsy preceding any eating disorder	5.9	2.04	9.77
Abbreviations: CI, confidence interval
Note: All analyses are based on samples for which both self and parent report were available (total sample: N=6483), for which the corresponding mental disorder and physical disease was reported, and for which one condition preceded the other. Subsamples were as follows: any affective disorder/arthritis: n = 35; any affective disorder/disease of digestive system: n = 47; any anxiety disorder/skin…
